# Supplementary material
Source: PubMed Central journal article supplement (PMC3155638)
Supplement: NIHMS302520-supplement-Supp_Figure_S1-S2_Table_S1.pdf [file NIHMS302520-supplement-Supp_Figure_S1-S2_Table_S1.pdf]

**Table S1. Data collection and refinement**

---

| <b>Data collection</b>             |                                                                               |
|------------------------------------|-------------------------------------------------------------------------------|
| Space group                        | C2                                                                            |
| Cell dimensions                    | $a=206.95$ , $b=49.77$ , $c=147.36$ Å<br>$\alpha=\gamma=90.0$ , $\beta=115.0$ |
| Mol. in ASU                        | 4                                                                             |
| Resolution range (Å)               | 50.0-2.1 (2.15-2.11)*                                                         |
| Redundancy                         | 3.6 (2.5)                                                                     |
| Completeness (%)                   | 96.3 (51.9)                                                                   |
| $I/\sigma I$                       | 19.5 (1.7)                                                                    |
| $R_{\text{sym}}$ (%)               | 7.0 (45.6)                                                                    |
| <b>Refinement</b>                  |                                                                               |
| Resolution range (Å)               | 41.2-2.1                                                                      |
| No. Reflections                    | 77,439                                                                        |
| $R_{\text{free}}$ (%)              | 22.1                                                                          |
| $R_{\text{cryst}}$ (%)             | 17.3                                                                          |
| Protein atoms (solvent)            | 9,469 (444)                                                                   |
| Average B-factor (Å <sup>2</sup> ) | 49.7                                                                          |
| RMSD bond lengths (Å)              | 0.009                                                                         |
| RMSD bond angles (°)               | 1.2                                                                           |
| Ramachandran analysis              |                                                                               |
| Favored (%)                        | 97.7                                                                          |
| Allowed (%)                        | 2.0                                                                           |
| Outliers (%)                       | 0.3                                                                           |

---

Data were obtained from a single crystal.

\*Values in parentheses refer to the high-resolution shell.

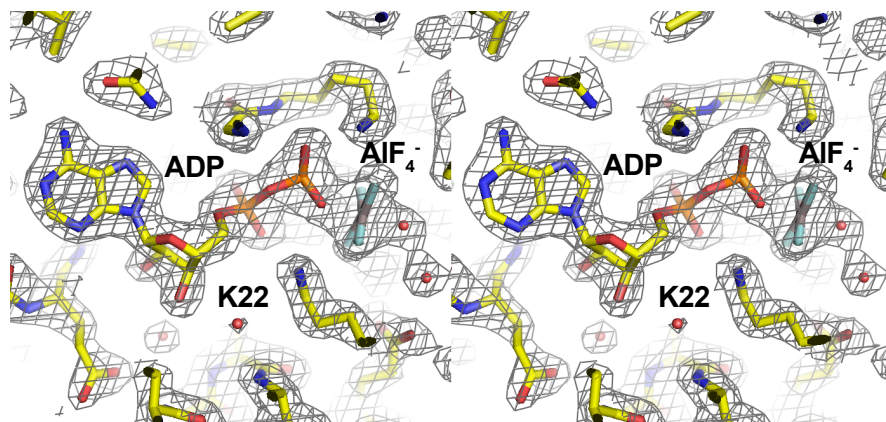

**Figure S1. Cross-eyed stereo view of electron density for the  $Mg^{2+}ADP \cdot AlF_4^-$  complex of *M. thermautotrophicus* TRC40. The refined model is superimposed onto a  $\sigma_A$ -weighted  $2F_o - F_c$  map calculated at 2.1 Å resolution and contoured at  $2\sigma$ .**

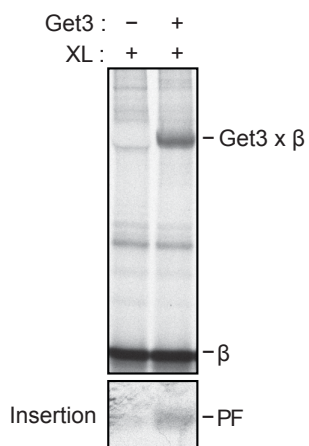

**Figure S2. Characterization of the depleted translation extract (PD-RRL).** Sec61 $\beta$  was translated in PD-RRL in the presence or absence of recombinant yeast Get3. An aliquot was subjected to chemical crosslinking with DSS to evaluate substrate interactions with 5 ng/ $\mu$ l Get3 (top panel). The remainder was incubated with yRMs and analyzed for insertion by the protease protection assay (bottom panel). PD-RRL lacks all known chaperones that interact with ER-directed TA proteins, and is deficient for insertion; activity was restored by supplementing with physiological levels of TRC40/Get3.
